# Supplementary material
Source: publisher figshare collection journal article supplement (https://tandf.figshare.com/articles/dataset/_/5001866)
Supplement: Supplementary file 2 [file 2]

Supplementary Information

Bird species richness and densities in relation to sulphur dioxide gradients and environmental variables

Luckson Muyemeki, Roelof Burger, Stuart J Piketh and Steven W Evans  
Ostrich 2017, 88(3): 253–259. DOI: <http://dx.doi.org/10.2989/00306525.2017.1310144>

| First-order measures |                                                                                                         |                                         |                                                                                   | Second-order measures |                                                                              |                                                                    |                                                                                      |
|----------------------|---------------------------------------------------------------------------------------------------------|-----------------------------------------|-----------------------------------------------------------------------------------|-----------------------|------------------------------------------------------------------------------|--------------------------------------------------------------------|--------------------------------------------------------------------------------------|
| Texture measure      | Statistical description                                                                                 | Formula                                 | Example (3 × 3 window)                                                            | Texture measure       | Statistical description                                                      | Formula                                                            | Example (3 × 3 window)                                                               |
| Mean                 | Average pixel value within a defined neighbourhood                                                      | $\frac{\sum x}{n}$                      | 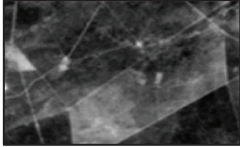 | Angular Second Moment | A measure of how regular or orderly the pixel values are across an image     | $\sum_i \sum_j \{p(i,j)\}^2$                                       |   |
| Range                | A measure of the difference between the maximum and minimum pixel values within a defined neighbourhood | $\max\{X\} - \min\{X\}$                 |  | Contrast              | A measure of the amount of local variation in pixel values within an image   | $\sum_i \sum_j p_{ij}(i-j)^2$                                      |   |
| Standard deviation   | A measure of variability of pixels within a defined neighbourhood                                       | $\sqrt{\frac{\sum (x - \bar{x})^2}{n}}$ |  | Correlation           | A measure of the linear dependency in pixel values among neighbouring pixels | $\frac{\sum_i \sum_j (ij)p_{ij} - \mu_x \mu_y}{\sigma_x \sigma_y}$ |   |
|                      |                                                                                                         |                                         |                                                                                   | Homogeneity           | A measure of homogenous pixel values across an image                         | $\sum_i \sum_j \frac{1}{1+(i-j)^2} p(i,j)$                         |  |

Figure S1: Image texture description and formula (adapted from Haralick et al. 1973)

Reference

Haralick RM, Shanmugan K, Dinstein IH. 1973. Textural features for image classification. *IEEE Transactions on Systems, Man and Cybernetics* 3: 610–621.
