# Supplementary material
Source: publisher figshare collection journal article supplement (https://tandf.figshare.com/articles/dataset/_/5001866)
Supplement: Supplementary file 3 [file 2]

Archive with 3 entries (3 files):
- tost_a_1310144_sm2436.pdf
- tost_a_1310144_sm7566.pdf
- tost_a_1310144_sm6524.pdf
